# Supplementary material for: Zeolite imidazolate framework/g-C3N4 derived Co nanoparticles embedded in nitrogen doped carbon for efficient hydrogenation of phenol
Source: Royal Society of Chemistry journal article supplement (doi:10.1039/d2nj04785c), 2022-01-01
Supplement: d2nj04785c1.pdf [file d2nj04785c1.pdf]

## Supplementary Information

### Zeolite imidazolate framework/g-C<sub>3</sub>N<sub>4</sub> derived Co nanoparticles embedded in nitrogen doped carbon for efficient hydrogenation of phenol

Zegang Qiu<sup>a</sup>, Zongxuan Li<sup>a</sup>, Shaobo Ma<sup>a</sup>, Zhiqin Li<sup>a\*</sup>, Yueling Cao<sup>b\*</sup>, Guangyu Li<sup>c</sup>

<sup>a</sup>Xi'an Shiyou University, Xi'an 710065, PR China

<sup>b</sup>Xi'an Key Laboratory of Functional Organic Porous Materials, School of Chemistry and Chemical Engineering, Northwestern Polytechnical University, Xi'an 710129, PR China

<sup>c</sup>State Key Laboratory of High-efficiency Utilization of Coal and Green Chemical Engineering, Ningxia University, Yinchuan 750021, China

\*Zhiqin Li: lizhiqin@xsyu.edu.cn;

\*Yueling Cao: yuelingcao@nwpu.edu.cn

**Table S1** Hydrogenation of phenol to cyclohexanol over various catalysts in references and this work

| Catalysts                              | Reaction conditions |       |     |             | phenol       | Cyclohexanol  | Reference | Date |
|----------------------------------------|---------------------|-------|-----|-------------|--------------|---------------|-----------|------|
|                                        | T/°C                | P/MPa | t/h | Solvent     | Conversion/% | Selectivity/% |           |      |
| Raney®Ni                               | 220                 | 2     | 2   | water       | 87           | 52            | [16]      | 2018 |
| Ni/SiO <sub>2</sub>                    | 200                 | 1     | 4   | water       | 100          | 100           | [17]      | 2017 |
| Ni/NiCaAlO <sub>x</sub>                | 110                 | 2     | 3   | n-hexane    | 99.9         | 99.9          | [18]      | 2021 |
| Co/CeO <sub>2</sub>                    | 150                 | 3     | 16  | water       | 82.5         | 100           | [19]      | 2020 |
| CoOx@C                                 | 150                 | 3     | 16  | water       | 98           | 77            | [20]      | 2018 |
| NiCo@C/ZrO <sub>2</sub>                | 200                 | 2     | 4   | water       | 96           | 91            | [21]      | 2019 |
| NiCo/γ-Al <sub>2</sub> O <sub>3</sub>  | 250                 | 2     | 4   | water       | 82           | 85            | [22]      | 2019 |
| NiCo/SDSW                              | 100                 | 5     | 4   | Isopropanol | 99.9         | 99.9          | [23]      | 2020 |
| NiCo/Mg <sub>x</sub> Ni <sub>y</sub> O | 150                 | 2     | 2.5 | n-Hexane    | 99.9         | 99.9          | [24]      | 2020 |
| <b>This work</b>                       | 120                 | 2     | 3   | water       | 97.8         | 100           |           |      |

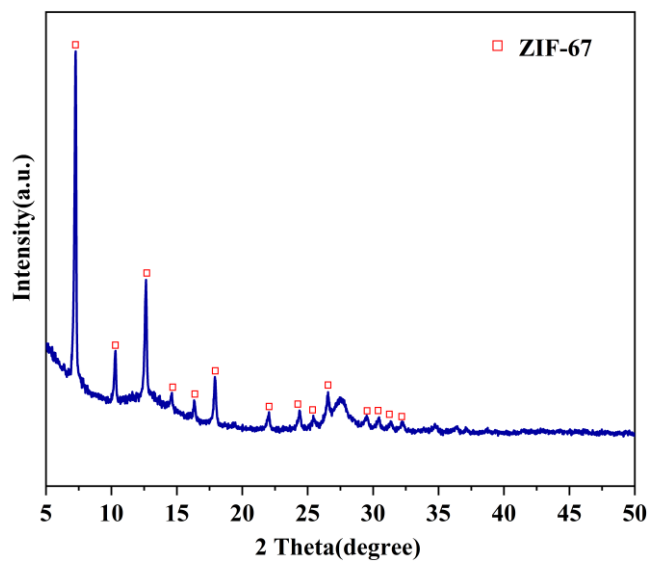

Fig. S1 XRD pattern of ZIF-67/g-C<sub>3</sub>N<sub>4</sub>

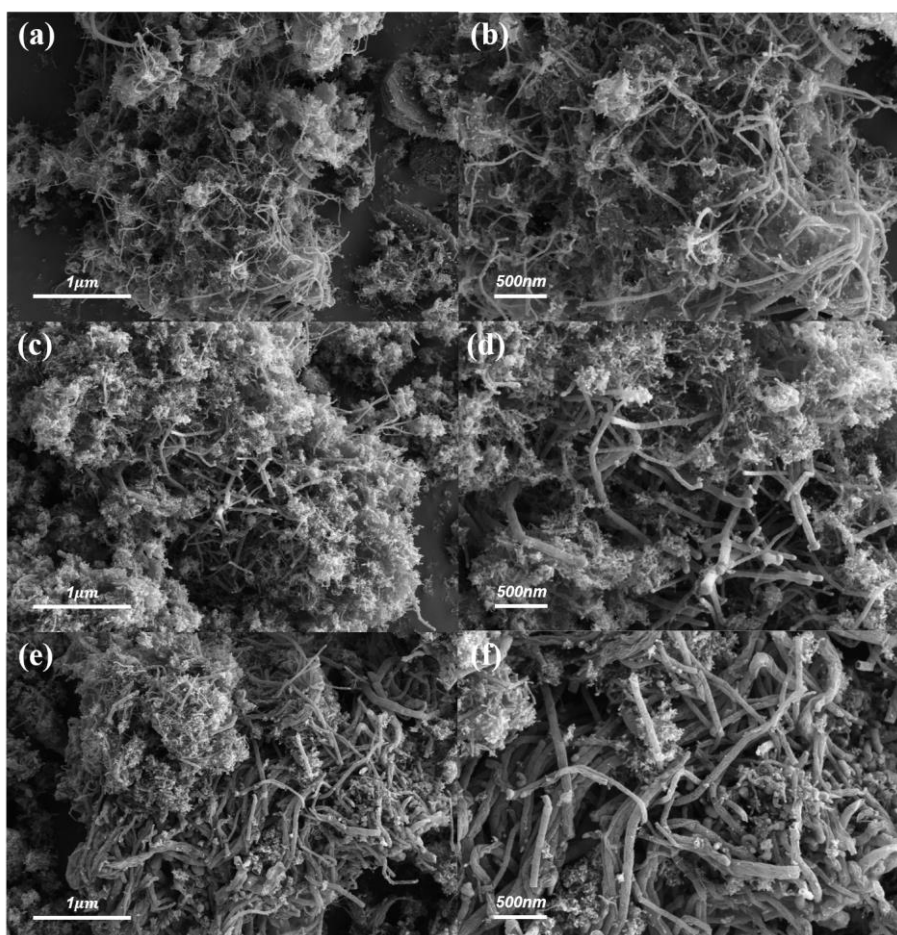

Fig. S2 SEM images of Co/NPCN<sub>0.25</sub>, Co/NPCN<sub>1.0</sub> and Co/NPCN<sub>1.5</sub> catalysts

(a)(b) Co/NPCN<sub>0.25</sub>; (c)(d) Co/NPCN<sub>1.0</sub>; (e)(f) Co/NPCN<sub>1.5</sub>

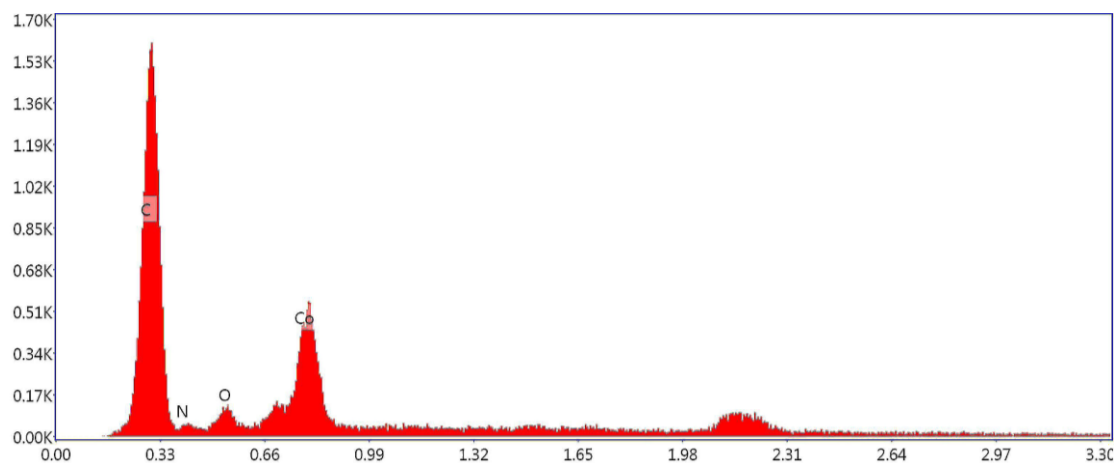

**Fig. S3** EDS spectra of Co/NPCN<sub>0.5</sub>

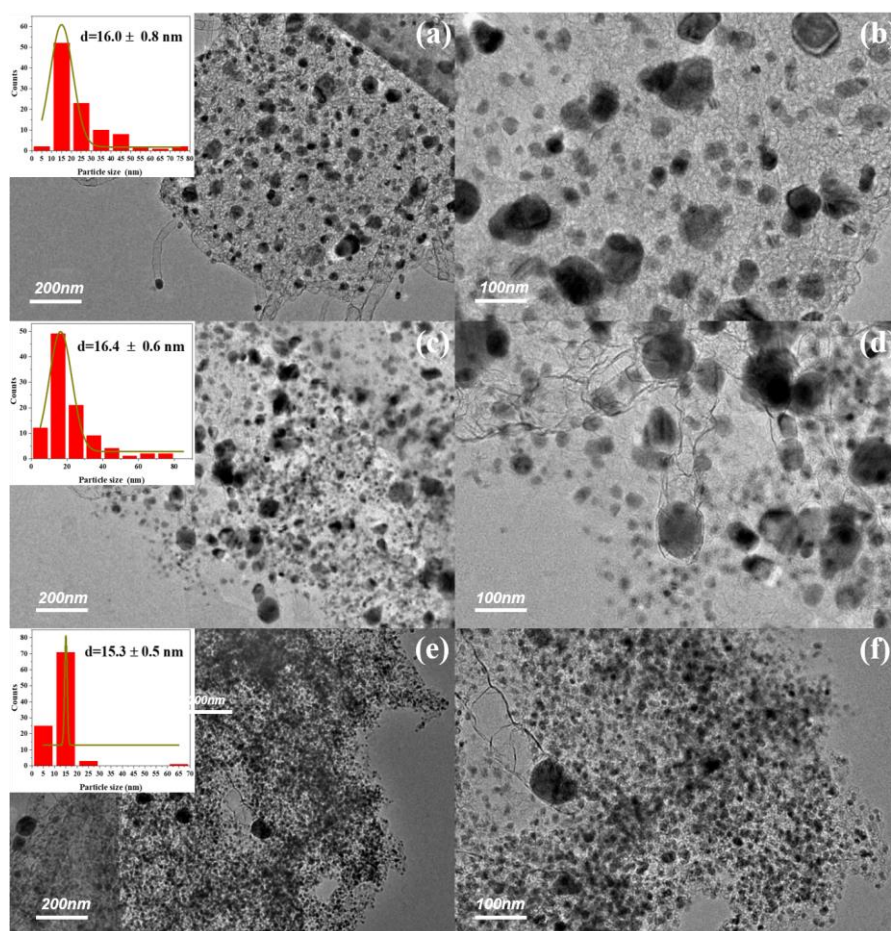

**Fig. S4** TEM images of Co/NPCN catalysts with different g-C<sub>3</sub>N<sub>4</sub> contents  
 (a), (b): Co/NPCN<sub>0.25</sub>; (c), (d): Co/NPCN<sub>1.0</sub>; (e), (f): Co/NPCN<sub>1.5</sub>

**Table S2** Determination of cobalt content in Co/NPCN with different g-C<sub>3</sub>N<sub>4</sub> content by ICP-AES

| Catalysts               | Co wt. (%) |
|-------------------------|------------|
| Co/NPCN <sub>0.25</sub> | 38.6       |
| Co/NPCN <sub>0.5</sub>  | 40.3       |
| Co/NPCN <sub>1.0</sub>  | 40.4       |
| Co/NPCN <sub>1.5</sub>  | 40.7       |

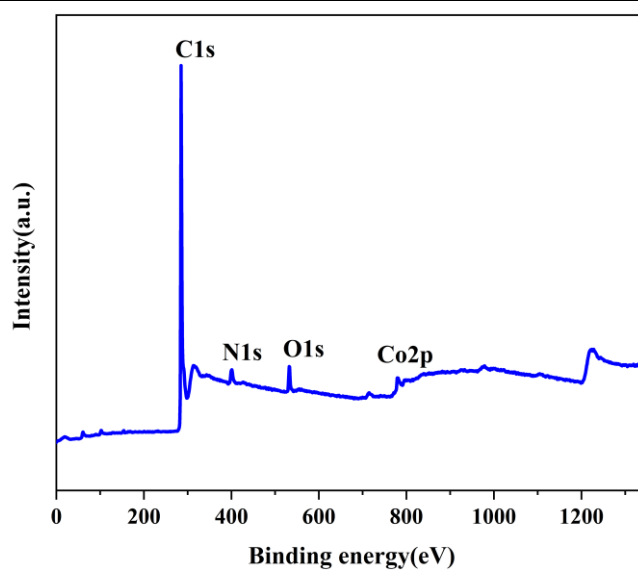

**Fig. S5** XPS survey spectrum of Co/NPCN<sub>0.5</sub>

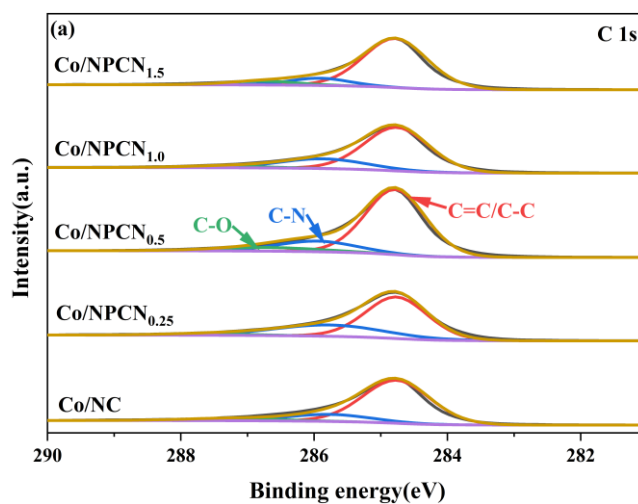

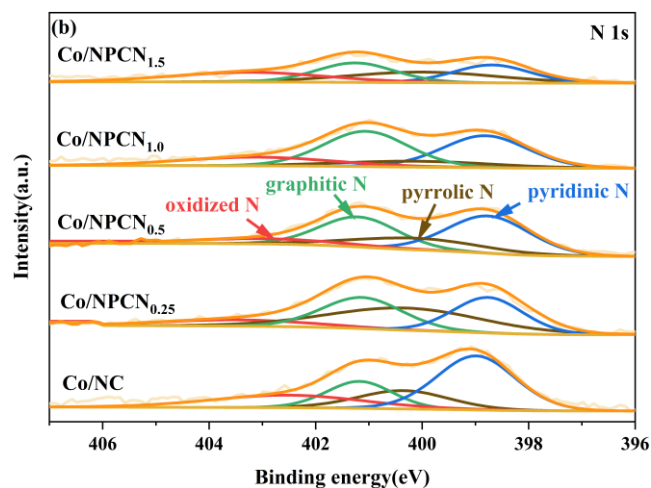

**Fig. S6** XPS Spectra of Co/NPCN catalysts with different g-C<sub>3</sub>N<sub>4</sub>

(a) C 1s; (b) N 1s

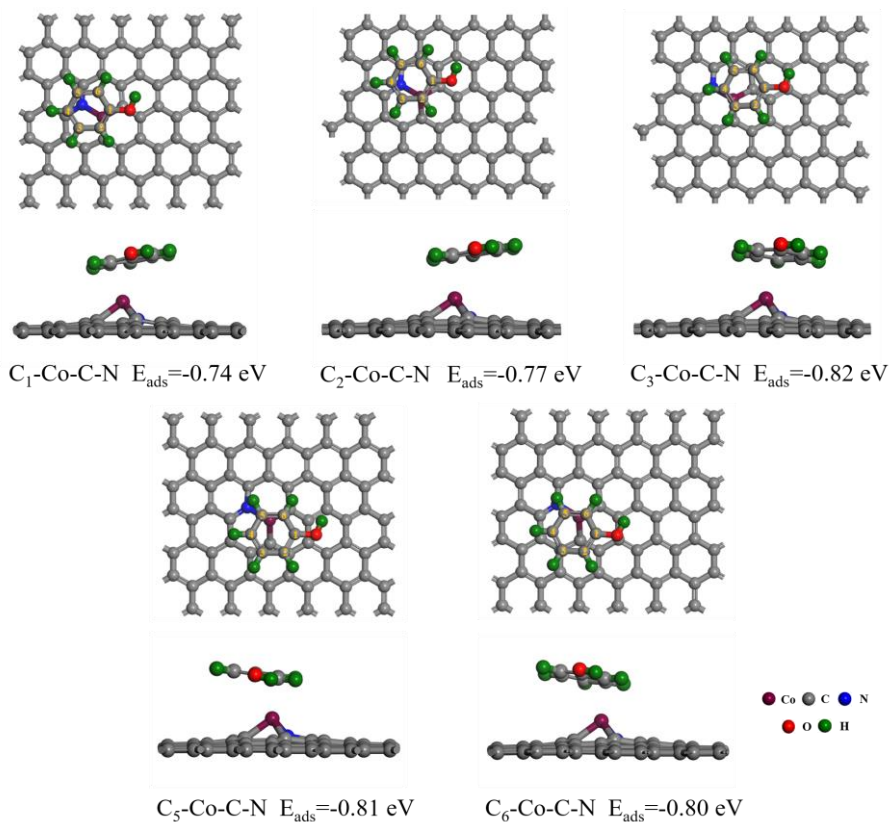

**Fig. S7** Parallel stable adsorption configurations of C<sub>1</sub>, C<sub>2</sub>, C<sub>3</sub>, C<sub>5</sub> and C<sub>6</sub> of phenol on Co sites of Co-C-N

The atomic colours of cobalt, carbon, nitrogen, oxygen and hydrogen are dark fuchsia, dark gray, blue, red and green, respectively.

**Table S3** Adsorption energies of parallel and vertical adsorption of phenol and cyclohexanol on Co sites of Co-C-N

| Adsorption atom | Adsorption energy (eV) |       |                     |              |       |
|-----------------|------------------------|-------|---------------------|--------------|-------|
|                 | Parallel adsorption    |       | Vertical adsorption |              |       |
| C <sub>3</sub>  | phenol                 | -0.82 | O                   | phenol       | -0.79 |
|                 | cyclohexanol           | -0.36 |                     | cyclohexanol | -1.04 |
| O               | phenol                 | -0.79 |                     |              |       |
|                 | cyclohexanol           | -1.09 |                     |              |       |

**Table S4** Catalytic performance of Co/NPCN catalysts at different pyrolysis temperatures

| Catalysts   | Phenol Conversion (%) | Cyclohexanol Selectivity (%) |
|-------------|-----------------------|------------------------------|
| Co/NPCN-600 | 0                     | --                           |
| Co/NPCN-700 | 72.8                  | 100                          |
| Co/NPCN-800 | 97.8                  | 100                          |
| Co/NPCN-900 | 29.6                  | 100                          |

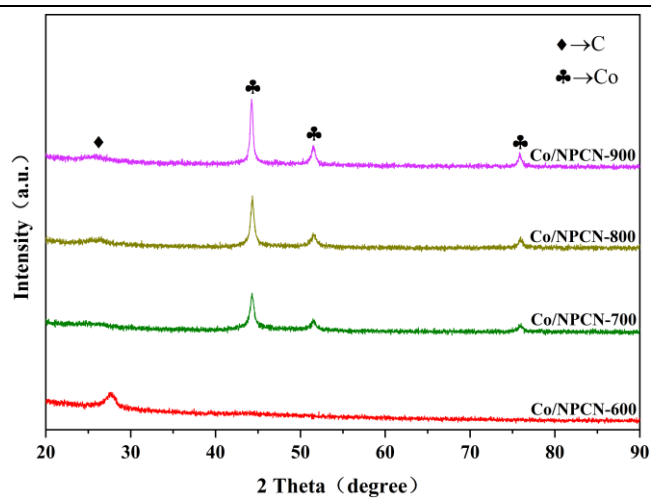

**Fig. S8** XRD patterns of Co/NPCN catalysts at different pyrolysis temperatures

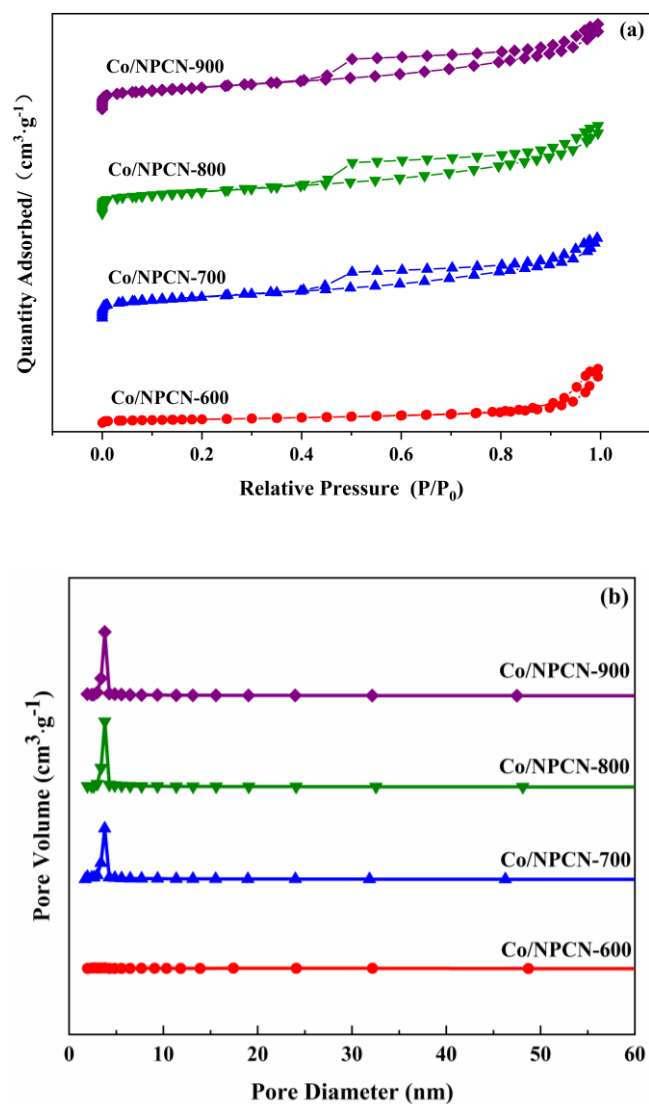

Fig. S9  $N_2$  adsorption-desorption isotherms (a) and pore size distribution curve (b)

Table S5 Structural parameters of Co/NPCN catalysts at different pyrolysis temperatures

| Catalysts   | $S_{BET}$ ( $m^2/g$ ) | $V_t^b$ ( $cm^3/g$ ) | $D^c$ (nm) |
|-------------|-----------------------|----------------------|------------|
| Co/NPCN-600 | 79.1                  | 0.3                  | 18.1       |
| Co/NPCN-700 | 320.1                 | 0.5                  | 6.1        |
| Co/NPCN-800 | 342.6                 | 0.8                  | 8.7        |
| Co/NPCN-900 | 330.3                 | 0.5                  | 6.3        |

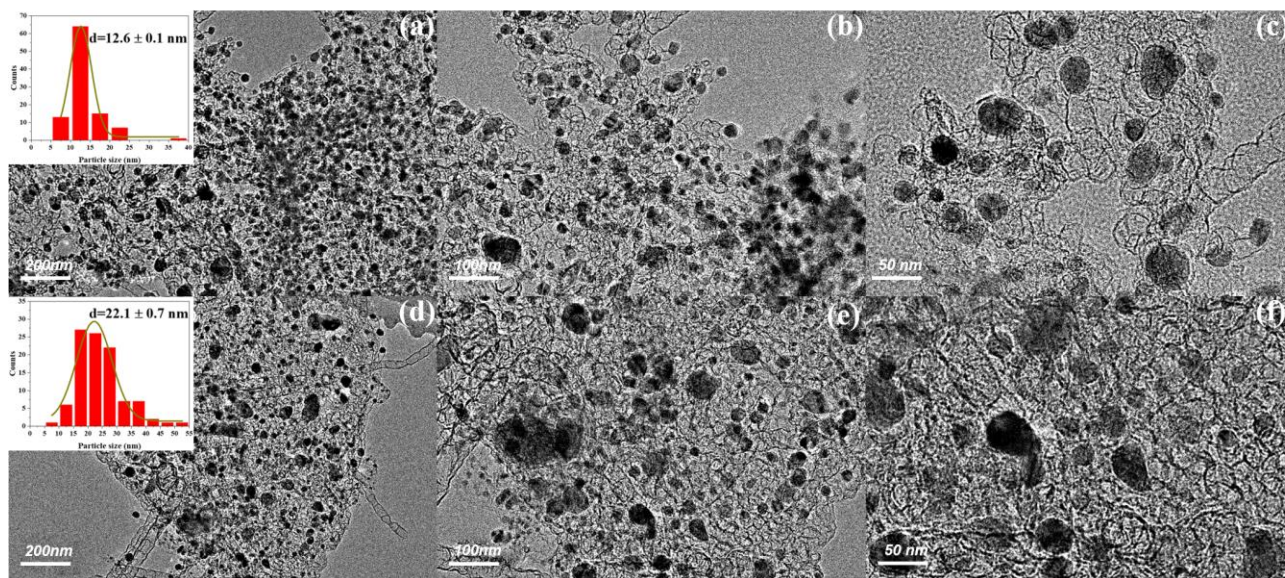

**Fig. S10** TEM images of Co/NPCN catalysts at different pyrolysis temperatures

(a), (b), (c) Co/NPCN-700; (d), (e), (f) Co/NPCN-900

**Table S6** Determination of cobalt content in Co/NPCN catalysts at different pyrolysis temperatures by ICP-

| AES         |           |
|-------------|-----------|
| Catalysts   | Co wt (%) |
| Co/NPCN-600 | 13.1      |
| Co/NPCN-700 | 39.1      |
| Co/NPCN-800 | 40.4      |
| Co/NPCN-900 | 40.7      |

**Table S7** Effects of different reaction pressures on selective hydrogenation of phenol

| Pressure<br>(MPa) | phenol<br>Conversion (%) | cyclohexanol<br>Selectivity (%) |
|-------------------|--------------------------|---------------------------------|
| 1.0               | 96.4                     | 100                             |
| 1.5               | 96.9                     | 100                             |
| 2.0               | 97.8                     | 100                             |
| 2.5               | 97.8                     | 100                             |
| 3.0               | 97.9                     | 100                             |

Reaction conditions: catalyst 50mg, phenol 0.2mmol, H<sub>2</sub>O 10mL, 120°C, 3h.



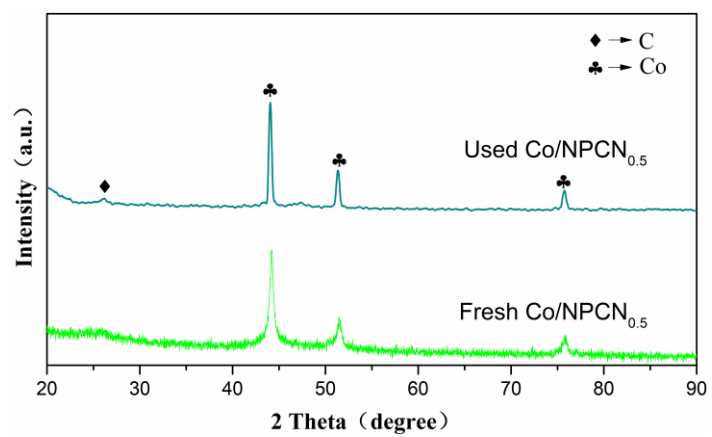

**Fig. S11** XRD patterns of fresh and used Co/NPCN<sub>0.5</sub> catalyst
